# Supplementary material for: Single-nuclei and bulk-tissue gene-expression analysis of pheochromocytoma and paraganglioma links disease subtypes with tumor microenvironment
Source: PubMed Central journal article supplement (PMC9587261; doi:10.1038/s41467-022-34011-3), 2022-10-21
Supplement: 41467_2022_34011_MOESM3_ESM.pdf [file 41467_2022_34011_MOESM3_ESM.pdf]

## Description of Additional Supplementary Files

**File Name:** Supplementary Data 1

**Description:** Patient sample metadata for samples analyzed by snRNA-seq.

**File Name:** Supplementary Data 2

**Description:** Cell type composition of each snRNA-seq sample.

**File Name:** Supplementary Data 3

**Description:** Sample metadata for samples analyzed with bulk RNA sequencing.

**File Name:** Supplementary Data 4

**Description:** Statistical testing for genotype-subtype associations (Fisher's exact test, Benjamini-Hochberg multiple testing correction).

**File Name:** Supplementary Data 5

**Description:** "One vs rest" differential gene expression analysis for each subtype. Performed on PCPG bulk-tissue RNA-seq.

**File Name:** Supplementary Data 6

**Description:** Differential expression analysis of pseudobulk data contrasting PCPG and NAM tissues by subtype or major normal cell type

**File Name:** Supplementary Data 7

**Description:** Differential expression analysis of pseudobulk data comparing macrophages, tip-like endothelial cells and stalk-like endothelial cells in tumor tissue versus NAM tissue.

**File Name:** Supplementary Data 8

**Description:** Significant differentially abundant cell types and cell subsets in PCPG tumor subtypes

**File Name:** Supplementary Data 9

**Description:** Cell interactions determined by the Network Analysis Toolkit for the Multicellular Interactions (NATMI) algorithm

**File Name:** Supplementary Data 10

**Description:** Classification of single neoplastic cells using normal fetal reference

**File Name:** Supplementary Data 11

**Description:** Gene set modules for fetal adrenal cells (extracted from Supplementary Table 5 Janksy et al 2021)

**File Name:** Supplementary Data 12

**Description:** Differentially expressed genes in metastatic PCPG compared to non-metastatic PCPG

**File Name:** Supplementary Data 13

**Description:** Gene set modules for stromal and immune cell types
